# Supplementary material for: Collagen Fibril Density Modulates Macrophage Activation and Cellular Functions during Tissue Repair
Source: Bioengineering (Basel). 2020 Mar 31;7(2):33. doi: 10.3390/bioengineering7020033 (PMC7356036; doi:10.3390/bioengineering7020033)

Supplementary

**Table S1.** Primer list.

| Gene           | Forward                | Reverse               |
|----------------|------------------------|-----------------------|
| <i>RPS26</i>   | CAATGGTCGTGCCAAAAAG    | TTCACATACAGCTTGGGAAGC |
| <i>ACTB</i>    | CATCCGCAAAGACCTGTACG   | CCTGCTTGCTGATCCACATC  |
| <i>αSMA</i>    | AGACCCTGTTCCAGCCATC    | TGCTAGGGCCGTGATCTC    |
| <i>Coll1a1</i> | GTCGCACTGGTGATGCTG     | GGTGGTGTCCACCTCGAG    |
| <i>EDA-FN</i>  | CCAGTCCACAGCTATTCTCTG  | ACAACCACGGATGAGCTG    |
| <i>MHC-II</i>  | TCCTGGTCCAACCTTCTGTCC  | CCCAACCTCATCCGATCTGA  |
| <i>CD163</i>   | GAGCAGCACATGGGAGATTG   | ACCTCCTCCATTACCAGGC   |
| <i>CD206</i>   | AACGGACTGGGTGCTATCA    | CCCATCCCTTGATAGAGCAT  |
| <i>IL-10</i>   | AGAACCAAGACCCAGACATCAA | AATAAGGTTTCTCAAGGGGCT |

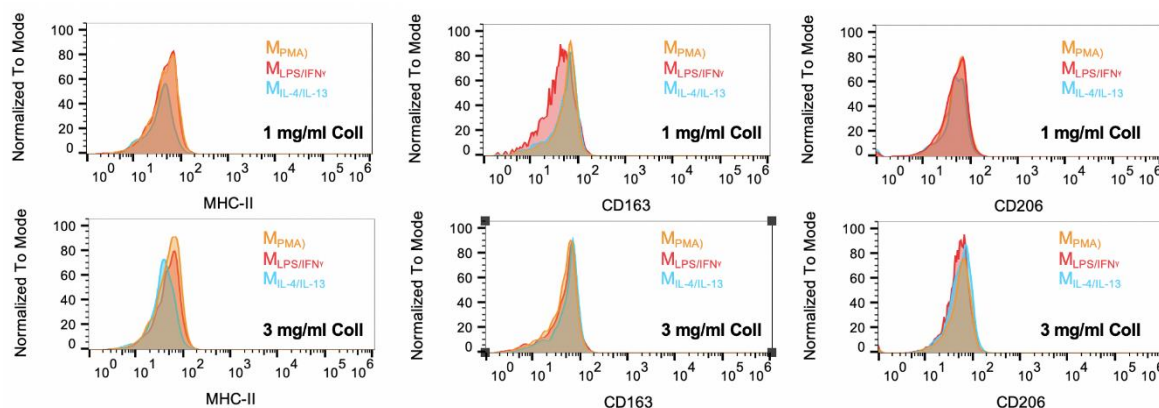

**Figure S1.** Flow cytometry analysis of unstained macrophages. Representative histogram plot of unstained cells for MHC-II, CD163 and CD206 are shown as a function of fluorescence signal intensity.

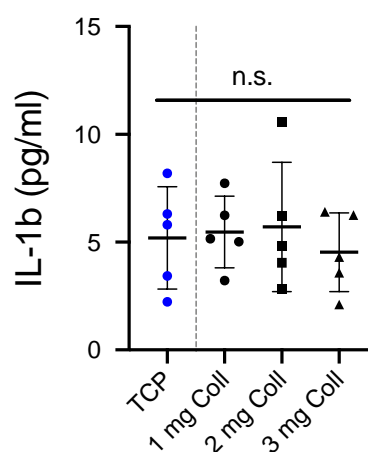

**Figure S2.** Quantitative analysis of IL-1 $\beta$  secretion by THP-1 cultivated onto tissue culture plastic (TCP) and 3D collagen matrices of concentration of 1, 2 and 3 mg/mL after 3 using ELISA (n = 5).

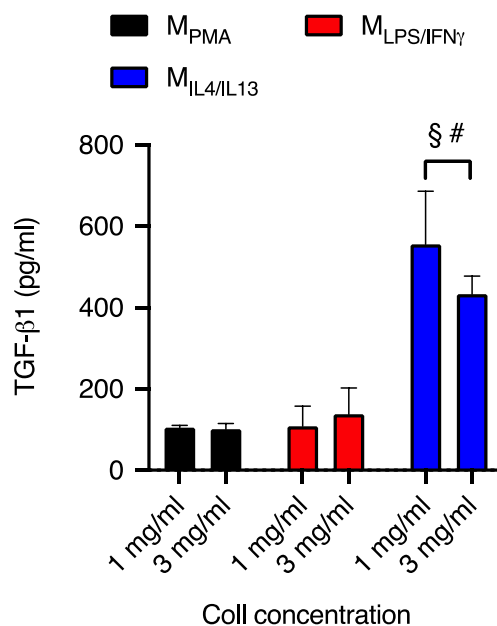

**Figure S3.** Quantitative analysis of free active TGF- $\beta$ 1 secretion by macrophages in a co-culture with fibroblasts after 3 days of culture using ELISA ( $n = 4$ ). Data are represented as mean  $\pm$  SD; \* significance level of  $p < 0.05$ ). The characters # and § represent the significance level of  $p < 0.05$  when compared to M<sub>PMA</sub> and M<sub>LPS/IFN $\gamma$</sub>  macrophages, respectively.

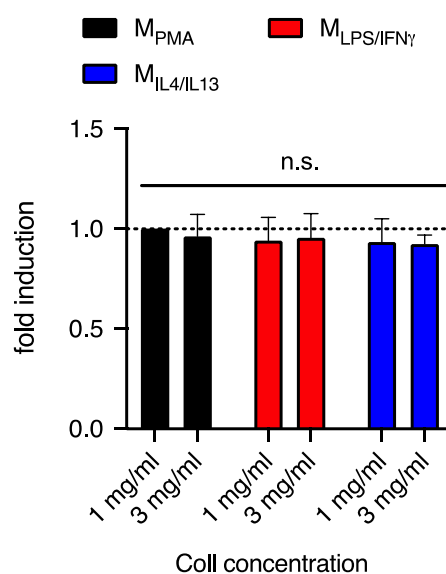

**Figure S4.** Quantitative analysis of aSMA expression by macrophages after 3 days of culture using qPCR ( $n = 4$ ). Data are represented as mean  $\pm$  SD.

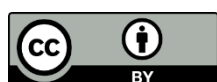

Supplement: Supplementary file 1 [file bioengineering-07-00033-s001.pdf]
